# Supplementary material
Source: PubMed Central journal article supplement (PMC2268816)

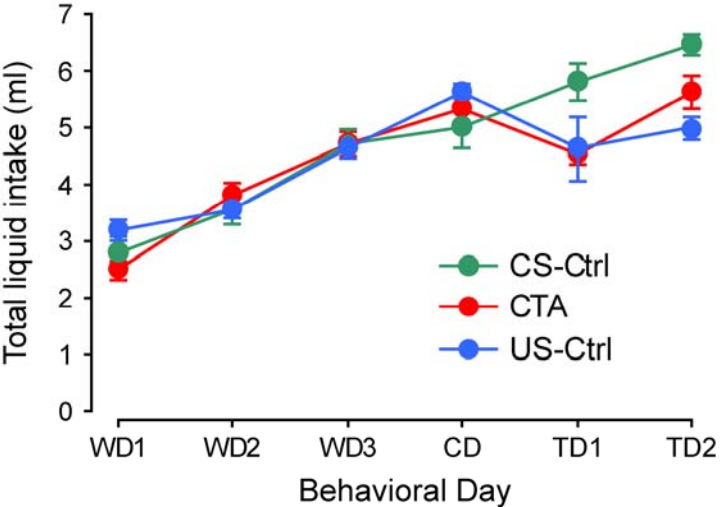

Supplement: pnas_0708927105_1.pdf [file pnas_0708927105_1.pdf]
